# Supplementary material for: Characteristics of craniofacial morphology and factors affecting them in patients with isolated cleft palate
Source: PeerJ. 2021 Apr 20;9:e11297. doi: 10.7717/peerj.11297 (PMC8063870; doi:10.7717/peerj.11297)
Supplement: Supplemental Information 1 — The raw data from cephalometric analysis of all 36 cases. [file peerj-09-11297-s001.xlsx]

## Sheet: Case No.1
Case No.1
	S point as the origin
Point	X	Y
S	0	0
N	62.9	9.1
Or	49.3	-18.3
ANS	66.9	-34.8
A	60.1	-41
U1	59.6	-64.6
L1	57.3	-64.6
B	53.2	-85.3
Pog	50.2	-98.7
Gn	47.6	-100.3
Me	44.3	-101
Go	-7.8	-65.5
Ar	-17.1	-26.4
Po	-25.7	-18.3
Ba	-26.1	-29.7
PNS	16.8	-38.4
UMo	36	-58

## Sheet: Case No.2
Case No.2
	S point as the origin
Point	X	Y
S	0	0
N	60.5	6.7
Or	50.4	-16
ANS	62.6	-36.9
A	58.3	-41.2
U1	54.9	-62.1
L1	53.4	-62.5
B	47.3	-77.7
Pog	42.9	-88.9
Gn	38.8	-91.9
Me	34.3	-92.8
Go	-9.3	-57.4
Ar	-14.2	-24.6
Po	-23.5	-16
Ba	-22.2	-30.1
PNS	20.3	-33.8
UMo	31.7	-54.2

## Sheet: Case No.3
Case No.3
	S point as the origin
Point	X	Y
S	0	0
N	64.7	9.8
Or	52.5	-15.5
ANS	63.3	-36.3
A	59.8	-39.6
U1	54.8	-62.9
L1	53.1	-63
B	43.9	-80.7
Pog	38.7	-91.8
Gn	34.9	-94.6
Me	30.9	-95.2
Go	-11.9	-59.2
Ar	-15	-25.2
Po	-25.1	-15.5
Ba	-23.5	-31.7
PNS	20.5	-34.8
UMo	34.5	-54.5

## Sheet: Case No.4
Case No.4
	S point as the origin
Point	X	Y
S	0	0
N	57.3	10.1
Or	50.5	-16.8
ANS	61.9	-33.8
A	58.1	-36.2
U1	56.5	-59.6
L1	55.5	-54.6
B	51.5	-66.4
Pog	49.2	-82.3
Gn	46.1	-85.6
Me	42.8	-87.2
Go	-7.7	-59.4
Ar	-12.3	-24.6
Po	-20.3	-16.8
Ba	-22.3	-31.2
PNS	21.2	-35.3
UMo	33.7	-51.3

## Sheet: Case No.5
Case No.5
	S point as the origin
Point	X	Y
S	0	0
N	60.8	8.2
Or	54.9	-16.9
ANS	67.6	-33.5
A	63.9	-39
U1	62	-58.9
L1	60.1	-57.5
B	57	-69
Pog	51.6	-85.7
Gn	48.3	-88.3
Me	43.6	-89.1
Go	-2.9	-59.7
Ar	-10.9	-23.6
Po	-19.5	-16.9
Ba	-20.2	-31.8
PNS	23.8	-35.5
UMo	39.3	-53.3

## Sheet: Case No.6
Case No.6
	S point as the origin
Point	X	Y
S	0	0
N	63.4	9.7
Or	52.9	-16.7
ANS	64.8	-33.8
A	61.7	-39.4
U1	60.5	-58.5
L1	59.6	-57.7
B	55.6	-70.5
Pog	50.3	-84.6
Gn	46.9	-87
Me	43.1	-88.2
Go	-3.1	-57.4
Ar	-11.7	-24.4
Po	-19	-16.7
Ba	-23.5	-30.9
PNS	23.1	-34
UMo	36.6	-50.6

## Sheet: Case No.7
Case No.7
	S point as the origin
Point	X	Y
S	0	0
N	59.9	12.6
Or	50.3	-14
ANS	64	-32.8
A	60.2	-38.1
U1	60.7	-59.8
L1	57.2	-56.8
B	53.6	-70
Pog	49.1	-86.7
Gn	46.7	-89.5
Me	43.4	-90.3
Go	-6.7	-61.3
Ar	-17	-26.6
Po	-26.3	-14
Ba	-24.9	-33.2
PNS	20.5	-33.1
UMo	34.9	-51.4

## Sheet: Case No.8
Case No.8
	S point as the origin
Point	X	Y
S	0	0
N	59.4	13.7
Or	48.8	-15.3
ANS	62.6	-31.7
A	58.8	-38.2
U1	55.2	-56.2
L1	52.1	-51.9
B	48.4	-66.7
Pog	45.7	-80.4
Gn	42.8	-82.8
Me	38.7	-83.5
Go	-9.5	-60
Ar	-13.4	-25.6
Po	-21.8	-15.3
Ba	-19.6	-32.2
PNS	20.4	-32.4
UMo	35	-48.3

## Sheet: Case No.9
Case No.9
	S point as the origin
Point	X	Y
S	0	0
N	61.1	12
Or	51.7	-15.5
ANS	62.5	-33.3
A	58.6	-38.3
U1	57.4	-60
L1	54.3	-58.1
B	52.7	-73.3
Pog	50.8	-89.3
Gn	47	-92.2
Me	43.9	-93.6
Go	-2	-57
Ar	-12.6	-26
Po	-21.5	-15.5
Ba	-21.6	-33.4
PNS	21.7	-33
UMo	35.2	-51.8

## Sheet: Case No.10
Case No.10
	S point as the origin
Point	X	Y
S	0	0
N	60.7	13.2
Or	52.5	-13.4
ANS	60.5	-29.9
A	56.8	-34.8
U1	56.8	-51
L1	54.5	-51.8
B	52.8	-66.3
Pog	53.9	-78.2
Gn	51.6	-81.4
Me	49	-82.3
Go	-4.9	-58.4
Ar	-15.3	-23.9
Po	-24.5	-13.4
Ba	-21.9	-29.3
PNS	19.3	-31.1
UMo	37	-48.6

[truncated: 26 more sheets: Case No.11, Case No.12, Case No.13, Case No.14, Case No.15, Case No.16, Case No.17, Case No.18, Case No.19, Case No.20, Case No.21, Case No.22, Case No.23, Case No.24, Case No.25, Case No.26, Case No.27, Case No.28, Case No.29, Case No.30 …]
